# Supplementary material for: Previous Usutu Virus Exposure Partially Protects Magpies (Pica pica) against West Nile Virus Disease But Does Not Prevent Horizontal Transmission
Source: MDPI journal article supplement (doi:10.3390/v13071409), 2021-07-20
Supplement: s1 [file s1]

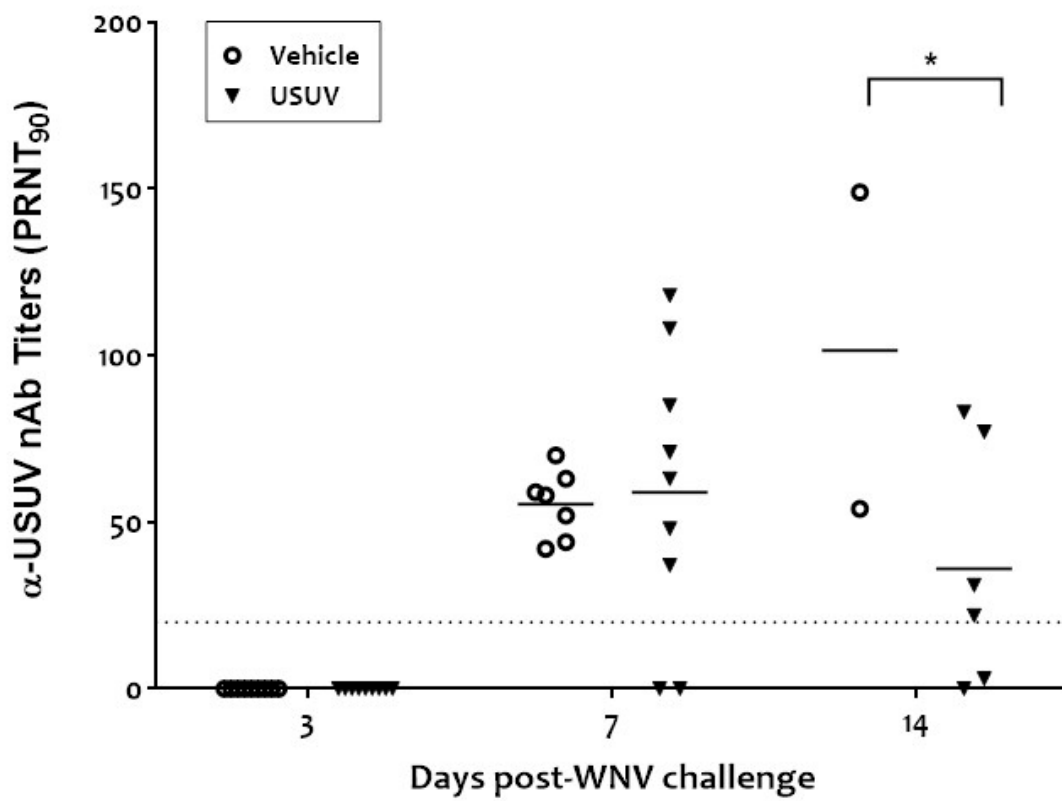

**Figure S1.** Neutralizing antibodies against USUV developed by experimentally WNV-infected magpies.
